# Supplementary material for: Land cover and vegetation data from an ecological survey of "key habitat" landscapes in England, 1992–1993
Source: Copernicus journal article supplement (doi:10.5194/essd-10-899-2018), 2018-05-18
Supplement: Supplementary file 1 [file essd-10-899-2018-supplement.zip]

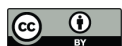

## *Supplement of*

# **Land cover and vegetation data from an ecological survey of “key habitat” landscapes in England, 1992–1993**

**C. M. Wood et al.**

*Correspondence to:* Claire M. Wood ([clamw@ceh.ac.uk](mailto:clamw@ceh.ac.uk))

- [essd-10-899-2018-supplement-title-page.pdf](#)
- [Key\\_Habitat\\_masks.rtf](#)
- [Key\\_Habitats\\_Supporting\\_Document.rtf](#)
- [S1.xlsx](#)

The copyright of individual parts of the supplement might differ from the CC BY 4.0 License.
