# Supplementary material for: Land cover and vegetation data from an ecological survey of "key habitat" landscapes in England, 1992–1993
Source: Copernicus journal article supplement (doi:10.5194/essd-10-899-2018), 2018-05-18
Supplement: Supplementary file 1 [file S1.xlsx]

## Sheet: Lookup_table_areas
Code number as recorded in field	Description of field code, as described in the field handbook	Original (1990) land cover classification	JNCC Broad Habitat	JNCC Priority Habitat, where appropriate
Field_code	Description	Land_cover_desc	Broad_Habitat	Priority_Habitat
31	Cliff > 30m high	Bare shore	Supra-littoral Rock	Maritime Cliffs and Slopes
32	Cliff 5-30m high	Bare shore	Supra-littoral Rock	Maritime Cliffs and Slopes
34	Rocky/boulder shore	Bare shore	Supra-littoral Rock
35	Pebble/gravel shore	Bare shore	Supra-littoral Rock
36	Sandy shore (or dune)	Bare shore	Supra-littoral Sediment	Sand Dune
37	Bare mud	Bare shore	Littoral Sediment
38	Sea	Sea	Sea
51	Lake - natural	Waterside/marsh	Standing Open Waters and Canals
52	Lake - artificial	Waterside/marsh	Standing Open Waters and Canals
53	River	Waterside/marsh	Rivers and Streams
56	Stream	Waterside/marsh	Rivers and Streams
58	Other ditch	Waterside/marsh	Rivers and Streams
101	Lowland agricultural grass	Neutral/improved grass	Neutral Grassland, Improved Grassland	Determined with use of species information
102	Upland grass	Acid grass/bracken	Acid Grassland
103	Moorland - grass	Moorland grass	Acid Grassland
104	Moorland - shrub heath	Heathland	Dwarf Shrub Heath	Upland Heath
105	Calcareous grassland	Semi-natural calcareous grass	Calcareous Grassland	Upland/Lowland Calcareous Grassland
106	Maritime vegetation	Maritime vegetation	Supra-littoral Rock/Sediment
107	Lowland heath	Heathland	Dwarf Shrub Heath	Lowland Heath
108	Aquatic macrophytes	Waterside/marsh	Standing Open Waters and Canals
110	Raised bog	Bog	Bog
111	Blanket bog	Bog	Bog	Blanket Bog
112	Valley bog	Bog	Bog
113	Fen	Waterside/marsh	Fen, Marsh, Swamp	Fen
114	Marsh	Waterside/marsh	Fen, Marsh, Swamp
115	Flush	Flush	Fen, Marsh, Swamp
116	Saltmarsh	Saltmarsh	Littoral Sediment	Coastal Saltmarsh
117	Wheat	Crops	Arable and Horticulture
118	Barley	Crops	Arable and Horticulture
119	Oats	Crops	Arable and Horticulture
120	Sugar beat	Crops	Arable and Horticulture
121	Turnips/swedes/roots	Crops	Arable and Horticulture
122	Kale	Crops	Arable and Horticulture
123	Potatoes	Crops	Arable and Horticulture
124	Field beans	Crops	Arable and Horticulture
125	Peas	Crops	Arable and Horticulture
126	Maize	Crops	Arable and Horticulture
127	Rye	Crops	Arable and Horticulture
128	Oilseed rape	Crops	Arable and Horticulture
129	Other Crops	Crops	Arable and Horticulture
129	Other Crops	Crops	Arable and Horticulture
129	Other Crops	Crops	Arable and Horticulture
130	Flowers	Crops	Arable and Horticulture
131	Commercial horticulture	Crops	Arable and Horticulture
132	Orchard	Crops	Arable and Horticulture
133	Unmanaged grass	Unmanaged grass/tall herbs	Neutral Grassland
134	Tall herb vegetation	Unmanaged grass/tall herbs	Neutral Grassland
135	Other Crops	Crops	Arable and Horticulture
135	Other Crops	Crops	Arable and Horticulture
135	Other Crops	Crops	Arable and Horticulture
135	Other Crops	Crops	Arable and Horticulture
135	Other Crops	Crops	Arable and Horticulture
141	Neglected	Crops	Arable and Horticulture
143	Ploughed	Crops	Arable and Horticulture
156	Pteridium aquilinum - dense	Acid grass/bracken	Bracken
172	Other	Other	Other (may be determined with use of species information)
172	Other	Other	Other (may be determined with use of species information)
172	Other	Other	Other (may be determined with use of species information)
173	Other	Other	Other (may be determined with use of species information)
173	Other	Other	Other (may be determined with use of species information)
174	Other	Other	Other (may be determined with use of species information)
174	Other	Other	Other (may be determined with use of species information)
174	Other	Other	Other (may be determined with use of species information)
202	Scattered trees	Woodland/trees	Broadleaved, Mixed and Yew Woodland/ Coniferous Woodland
203	Line of trees	Woodland/scrub	Broadleaved, Mixed and Yew Woodland/ Coniferous Woodland
204	Belt of trees	Woodland/trees	Broadleaved, Mixed and Yew Woodland/ Coniferous Woodland
205	Clump of trees	Woodland/trees	Broadleaved, Mixed and Yew Woodland/ Coniferous Woodland
206	Woodland/forest	Woodland/trees	Broadleaved, Mixed and Yew Woodland/ Coniferous Woodland	Determined with use of species information
207	Individual scrub species	Woodland/scrub	Broadleaved, Mixed and Yew Woodland/ Coniferous Woodland
208	Scattered scrub	Woodland/scrub	Broadleaved, Mixed and Yew Woodland/ Coniferous Woodland
209	Line of scrub	Woodland/scrub	Broadleaved, Mixed and Yew Woodland/ Coniferous Woodland
210	Patch of scrub	Woodland/scrub	Broadleaved, Mixed and Yew Woodland/ Coniferous Woodland
290	Dead standing trees	Woodland/scrub	Broadleaved, Mixed and Yew Woodland/ Coniferous Woodland
293	Ride/firebreak	Woodland/scrub	Broadleaved, Mixed and Yew Woodland/ Coniferous Woodland
331	Stone bank	Urban	Urban
401	Building	Urban	Urban
402	Garden/grounds with trees	Urban	Urban
403	Garden/grounds without trees	Urban	Urban
404	Public open space	Urban	Urban
405	Amenity grass > 1ha	Neutral/improved grass	Improved Grassland
406	Allotments	Urban	Urban
407	Car park	Urban	Urban
409	Garden centre/nursery	Urban	Urban
410	Embankment	Urban	Urban
411	Other land	Urban	Urban
430	Waste - domestic	Urban	Urban
431	waste - industrial	Urban	Urban
433	Gravel pit	Urban	Urban
451	Railway track/land	Urban	Urban
452	Road (tarmac)	Urban	Urban
454	Verge 1-5m	Urban	Urban
456	Constructed track	Urban	Urban
457	Unconstructed track	Urban	Urban
458	Footpath (exclusive)	Urban	Urban
459	Footpath (other)	Urban	Urban
501	School playing fields	Urban	Urban
502	Other playing fields	Urban	Urban
503	Golf course	Urban	Urban
504	Other	Urban	Urban
507	Static caravan(s)	Urban	Urban
508	Touring caravan park	Urban	Urban
511	Other designated area	Urban	Urban
521	Horsiculture	Urban	Urban
601	Dry heath	Heathland	Dwarf Shrub Heath	Upland/Lowland Heath
602	Wet heath	Heathland	Dwarf Shrub Heath	Upland/Lowland Heath
631	Setaside	Unmanaged grass/tall herbs	Neutral Grassland
645	Glade	Woodland/scrub	Broadleaved, Mixed and Yew Woodland/ Coniferous Woodland
777	Unknown	Other	Other (may be determined with use of species information)
