# Supplementary material for: Land cover and vegetation data from an ecological survey of "key habitat" landscapes in England, 1992–1993
Source: Copernicus journal article supplement (doi:10.5194/essd-10-899-2018), 2018-05-18
Supplement: Supplementary file 2 [file essd-10-899-2018-supplement.zip]

Archive with 4 entries (4 files):
- S1.xlsx
- Key_Habitat_masks.rtf
- Key_Habitats_Supporting_Document.rtf
- essd-10-899-2018-supplement-title-page.pdf
