# Supplementary material for: Land cover and vegetation data from an ecological survey of "key habitat" landscapes in England, 1992–1993
Source: Copernicus journal article supplement (doi:10.5194/essd-10-899-2018), 2018-05-18
Supplement: Supplementary file 2 [file essd-10-899-2018-supplement.zip › Key_Habitat_masks.rtf]

Spatial masks for calcareous, coastal, upland and lowland heath habitats [Key Habitats 1992-93] (2017)
Bunce, R.G.H, Parr, T.W., Ullyett, J., Hornung, M., Gerard, F., Bull, R., Cox, R., Brown, N.J.
Dataset Name:	Spatial masks for calcareous, coastal, upland and lowland heath habitats [Key Habitats 1992-93]	
Dataset Background & Description:	Since 1978, a series of national surveys (Countryside Surveys) have been carried out by the Institute of Terrestrial Ecology/Centre for Ecology and Hydrology to gather data on the natural environment.  The sampling framework for these surveys is not optimised to yield data on rarer or more specialised habitats.  This Key Habitat survey was commissioned in the early 1990s to carry out additional survey work into habitats which were perceived to be under threat or which represented areas of concern to the Department for the Environment.  The habitats were:  Lowland heath, Chalk and limestone grasslands, Coasts, Uplands.   For reporting purposes, the survey was supplemented by additional data, particularly for river valleys and waterside landscapes (lowlands), from Countryside Survey 1990.  The masks provided by this dataset were used to define the population from which the 1km sampling sites were selected, and are thus existing or potential areas for the location of the habitats in question.	
Geographic Coverage:	England 	
Time Period:	1992-93	
Data Categories:	Spatial masks for:	Calcareous landscapes 		
		Coastal landscapes		
		Upland and lowland heath landscapes 		
Survey Design & Methods:	Stratified sampling across entire area.  Bunce & Shaw's 1973 standardized survey methods with modifications – refer to field handbooks. 	
Related Datasets:	Countryside Survey http://www.countrysidesurvey.org.uk/
Barr, C.J.; Bunce, R.G.H.; Cummins, R.P.; Hallam, C.J.; Hornung, M.; Wood, C.M. (2017). Habitat and vegetation data from an ecological survey of terrestrial key habitats in England, 1992-1993. NERC Environmental Information Data Centre. https://doi.org/10.5285/7aefe6aa-0760-4b6d-9473-fad8b960abd4    	
Key documents & publications:	·	Barr, C.J. (1993) Changes in Key Habitat: Surveys of Chalk & Limestone Grassland, Coastal, and Upland Landscapes, Field Handbook. Draft 3. Grange-over-Sands, NERC/Institute of Terrestrial Ecology. 
·	Barr, C.J. (1992) Changes in Key Habitat: A Survey of Lowland Heath, Field Survey Handbook. ITE Merlewood. 
·	Barr, C.J. (1997) Current Status and Prospects for Key Habitats in England, Part 6 Summary Report. Institute of Terrestrial Ecology, University of Sheffield - Unit of Comparative Plant Ecology, Environmental Resource Management Ltd, Department of the Environment, Transport and the Regions.
·	Bunce R.G.H & Shaw M.W. (1973). A Standardized Procedure for Ecological Survey. Journal of Environmental Management, Vol. 1, 239-258.	
Originator Details:	Mask development: Parr, T.W., Ullyett, J., Hornung, M., Gerard, F.O., Bull, R., Cox, R., Brown, N.J. Institute of Terrestrial Ecology, Monks Wood, Cambridgeshire.
Survey & Project Management: Barr C.J., Bunce, R.G.H., Cummins, R.P., Hallam, C.J. Hornung, M.:  Institute of Terrestrial Ecology, Merlewood, Grange over Sands, Cumbria.
Data management: Wood, C.M., Centre for Ecology & Hydrology, Lancaster.	
Quality control: 	Work has been carried out to validate the masks through comparisons with other information. The overall conclusion was that although there are some mis-matches between the masks and other data sets, the fit was judged to be acceptable for the purposes of the Key Habitat project.	

Geographical distribution


Note that some masks overlap


Background
A survey was designed to collect data on the ecological characteristics of the landscape and the status of key habitats.  A stratified-random strategy was used to ensure adequate representation of designated and non-designated land and the range of ecological variation within the landscape.
Survey sampling points were selected at random from within a set of spatial masks (i.e. the data set described by this document).  The survey was carried out in 1992 and 1993, and the data has been published (Barr et al., 2017).
Barr, C.J.; Bunce, R.G.H.; Cummins, R.P.; Hallam, C.J.; Hornung, M.; Wood, C.M. (2017). Habitat and vegetation data from an ecological survey of terrestrial key habitats in England, 1992-1993. NERC Environmental Information Data Centre. https://doi.org/10.5285/7aefe6aa-0760-4b6d-9473-fad8b960abd4 
The spatial masks were defined as below.

Defining the calcareous grassland mask


The calcareous grassland mask was based on a sample of 1 km squares in England containing existing and potential areas of calcareous grassland habitat.  This database, and the landscape map derived from it, was derived by using a GIS (Geographical Information System) to combine data on geology and drift deposits to identify areas of England with characteristics suitable for supporting these grassland habitats. The rationale and methodology behind the derivation of the database are described in this section.
The criteria used to develop the database were that it should:
(i) cover areas of existing calcareous grassland and areas with potential to become calcareous grassland;
(ii) be based on a 1 km square National Grid framework.

Areas with potential to become calcareous grassland were included to allow for the possibility of these habitats becoming more common in the future. These grasslands were once extensive in some parts of the country, but changes in land use have led to the disappearance and fragmentation of the habitat.  However, it is possible that this decrease may not continue and that, in some areas of England, calcareous grasslands could begin to increase.  Vestiges of calcareous grasslands can still be found in other land cover types such as pastures and roadside verges and with changes in land use and agricultural practice some of this may change back to good quality chalk or limestone grassland. In addition, a widespread interest in grassland recreation within such schemes as Countryside Stewardship and Environmentally Sensitive Areas also offers the financial means for direct re-creation of calcareous grasslands, even in areas which are currently arable or improved grassland and which have no remaining species characteristic of calcareous grassland.
Areas of potential calcareous grassland were identified by using a combination of data on solid geology and quaternary deposits.  Solid geology provides a good coarse area boundary definition since the light, friable, well drained soils which characterise chalk grassland areas are dependent to a large extent on the underlying geology.  Simplified digitised versions of the 1:625 000 BGS solid geology and quaternary maps (drift geology) of Britain were employed.  Using these data, a 1 km resolution map was defined by:-
(i) first, identifying 1 km squares dominated by marine limestones, Oolitic and friable limestones, and metamorphic limestones ;
(ii) second, modifying the map, using quaternary drift deposits (excluding loess) to exclude squares where the rocks are overlain with non-calcareous soils; 
(iii) thirdly, expanding the area defined in (ii) by adding any adjacent 1km squares containing steep slopes. This step was taken improve the coverage of sites found on escarpments. 
(iv) finally, squares with more than 75% urban land (as measured from the 1:250000 OS maps) were then excluded.
Work has been carried out to validate the calcareous grassland mask through comparisons with other information. The overall conclusion is that although there are some mis-matches between the calcareous grassland mask and other data sets, the fit was judged to be acceptable for the purposes of the project.
The calcareous mask covers 26555 1 km squares in England.


Defining the Coastal mask
The coastal mask was defined as that area of land extending 500 m inland from the high water mark (HWM) plus all contiguous areas of saltmarsh, dunes and coastal bare land.  


The HWM data from Ordnance Survey were not available for use in this project so alternative means of defining the HWM were investigated.  The Land Cover Map 1990 (Fuller et al., 1993) gave the most accurate location of the HWM and this was chosen for use.  
The coastline definition used in the production of the Land Cover Map 1990 was a semi-automated procedure.  Combined winter and summer Landsat satellite images were used to define land cover in every 25 m x 25 m area of Great Britain.  From an initial classification, maritime land cover classes (sea, coastal bare and saltmarsh) were extracted and this area was smoothed using a combination of interactive editing and automatic filters to remove holes in the mask, and erroneous 'inland maritime areas'.  The inland edge of the mask was used to identify a smooth coastline which then used to constrain land cover by imposing the rule that terrestrial habitats are found inland of the line and coastal habitats to the seaward.  In many parts of the country, particularly in hard coast areas, there was close agreement (±50 m) between the coastline defined in this way and the HWM shown on 1:10,000 OS maps.  In other areas, particularly on soft and estuarine coasts the agreement was less close.
The coastline defined from the 25 m resolution ITE Land Cover Map was used to define the coastline within the coastal landscape and a 500 m buffer zone extending inland of this defined the inland limit of this zone.  This inland coastal buffer was created by expanding the coastline inland by 20 Land Cover Map grid cells (25 x 25m pixels), using Arc/Info GIS.  The coastal buffer was defined as that set of contiguous 1 km grid cells in England where coastal attributes (i.e.  coastal buffer, saltmarsh or coastal bare) were present.  The buffer lying inland or offshore of this was discarded, apart from Lundy, as these were isolated misclassified pixels from the Land Cover Map.  The borders between England and Scotland and Wales were defined using the Bartholomew's 1:250,000 map.  
For each 1 km square the total area of coastal buffer was calculated and then broken down into 14 main land cover types.  The area of sea, saltmarsh and coastal bare within the square was also calculated.  
The final 1 km square database contained 8870 km squares which were covered in some part by the coastal zone.
The coastal mask covers 8870 km squares in England.  Of these, 787 urban squares (> 75 % built up) and 742 squares which were predominantly sea and which were not included in the ITE Land Classification (Bunce et al., 1990), were excluded leaving a total of 7341.  
Fuller, R.M.; Groom, G.B.; Jones, A.R.; Thomson, A.G. (1993). Land Cover Map 1990 (25m raster, GB). NERC Environmental Information Data Centre. https://doi.org/10.5285/3d974cbe-743d-41da-a2e1-f28753f13d1e 
Bunce, R.G.H.; Barr, C.J.; Clarke, R.T.; Howard, D.C.; Lane, A.M.J. (1990). ITE land classification of Great Britain 1990. NERC Environmental Information Data Centre. https://doi.org/10.5285/ab320e08-faf5-48e1-9ec9-77a213d2907f 

Defining the Lowland Heath Mask


The lowland heath mask was based on a database of 1 km squares in England containing existing and potential areas of lowland heath landscape.  This database was constructed by combining data on soils and altitude and used in a Geographical Information System (GIS) to create a map showing the distribution of these heathland areas.  The database also provided the population from which a stratified random sample of 1 km squares was subsequently taken for field survey.  The rationale and methodology behind the derivation of the lowland heath database and mask are described in this section.
In constructing the database and map of the lowland heath mask, the aim was to include only those 1 km squares which had, or had the potential for, heathland cover at a landscape scale, defined as squares with potential to contain lowland heath as a dominant or sub-dominant vegetation type.  The map was not intended to cover squares with small areas of lowland heath.
Soil types characteristic of lowland heath vegetation and landscapes were used to define a population of 1 km squares having potential for heath. For this work a 1 km database of the Soil Survey and Land Research Centre was used which provided data in digital form on dominant and sub-dominant soils within 1 km grid squares.  Soil types most likely to support heathland vegetation were identified and their distribution mapped.  Comparison with known areas of heathland provided information for further soil categories to be added to the map; some of these were combinations of dominant and sub-dominant soil types to avoid mapping areas which did not contain lowland heath. Peat soils were also included as these have a potential for heathland, especially in the vicinity of existing heathlands. 
Soil types used to indicate potential lowland heath landscape (typology from Soil Survey of England and Wales 1983)
a)	Where the following Soil Types are dominant in a 1 km square
	
Brown calcareous sands (series 5.21) 
Brown sands  (series 5.51, 5.52, 5.54, 5.55)
Typical brown podzolic soils (series 6.11)
Paleo argillic podzols (series 6.34)
Humo-ferric podzols (series 6.31)
Ferric podzols (series 6.33)
Gley podzols (series 6.41, 6.43)
Soils on ultra-basic rock (Lizard area) (series 7.17)
Typical humic gley soils (series 8.71)
Peat soils  (series 10.11, 10.13)
"     "	(series 10.21, 10.22, 10.24, 10.25 )	

b) Where the following dominant and sub-dominant soil types occur together in particular regions	

Dominant Soil Type

Brown rendzinas 3.43
Brown rendzinas 3.43   	
Brown rendzinas 3.43 
Brown earths 5.41
Argillic brown earths 5.71 
Argillic brown earths 5.72 
Humic alluv. gleys 8.61	
Stagnogleys 7.11	
with Sub-dominant 

Brown calc. sands 5.21
Brown sands 5.54	  
Brown Sands 5.51       
Humic gleys 8.71 
Humic gleys 8.71        
Humic gleys 8.71  
Gley podzols 6.41 
Stagnogley podzols 6.43	
Region

Thetford 
“
“
Lyme Bay 
“
“
Dorset 
New Forest	

Soils data alone cannot be used to differentiate between upland and lowland heaths.  This differentiation is to some extent subjective as there is considerable overlap between their species compositions and the same NVC classes may occur in areas traditionally considered as either.  Lowland heath cannot simply be defined in terms of altitude because climate varies in different parts of England such that what might be considered as “upland” vegetation may occur at relatively low altitudes in harsher environments.  Thus, whereas the lowland/upland vegetation interface may be considered to occur somewhere in the region of 200-300 metres in the south of England, in the north characteristically "upland" vegetation may occur in areas about at sea level.  In order to overcome these regional differences, use has been made of the ITE Land Classification 1990 (Bunce et al., 1990).  Land classes 17-24 and 27-32 which are characteristically "upland" in nature have been used to exclude areas of England unlikely to contain lowland heath landscape areas.   This definition of uplands departs from that used in the 'Countryside Survey 1990' project and in the separate report on uplands, in both of which land class 27 has not been included in the uplands. 
Coastal heathlands are poorly covered by this mask because they tend to be small and difficult to associate with soil types marked on the 1:250 000 map.  Attempts were made to identify soils in areas of known coastal heathlands so that they could be incorporated into the map of potential lowland heath defined above.  Unfortunately, the soils identified were not specific to coastal heathland areas and no procedure could be devised to limit the soil types to those areas.  Even the addition of a buffer zone along the coastline was unable to separate coastal heathlands from other areas.  However, coastal heathlands are also part of the current project and are reported separately.
Work has been carried out to validate the lowland heath mask through comparisons with other information.  The overall conclusion is that although there are some mis-matches between the lowland heath mask and other data sets, the fit was judged to be acceptable for the purposes of this project.
The lowland heath mask covers 8538 1 km squares in lowland England.
Bunce, R.G.H.; Barr, C.J.; Clarke, R.T.; Howard, D.C.; Lane, A.M.J. (1990). ITE land classification of Great Britain 1990. NERC Environmental Information Data Centre. https://doi.org/10.5285/ab320e08-faf5-48e1-9ec9-77a213d2907f 

Defining the upland mask
While the use of contours might be expected to provide a simple method for mapping upland landscapes, land above certain altitude limits in northern England is very different, in overall character, to land above the same contour in the south.  


To allow for the inherent variation in land above certain altitudes in different parts of England, the upland mask was derived from the ITE Land Classification 1990 (Bunce et al., 1990).  This classification uses a range of  environmental and physical parameters  to assign  all the 1 km squares in Great Britain into one of 32 land classes; these classes have then  been aggregated into groups which are predominantly 'upland'  (land classes 17-24 and 27-32)  or predominantly 'lowland'  (land classes 1-16, 25 and 26) in character.  
The upland land classes are the same as those used in the definition of marginal upland and upland landscapes used to present results for Countryside Survey 1990 - with the exception that land classes 29-32 were not included because they do not occur in England.   Fifty-one 1 km squares which were predominantly urban (shown as >75% towns on Ordnance Survey 1:250,000 maps) were excluded leaving a total of 15616 squares in the final upland map.
The upland mask covers 15616 km squares in England. 
Bunce, R.G.H.; Barr, C.J.; Clarke, R.T.; Howard, D.C.; Lane, A.M.J. (1990). ITE land classification of Great Britain 1990. NERC Environmental Information Data Centre. https://doi.org/10.5285/ab320e08-faf5-48e1-9ec9-77a213d2907f 
Dataset structure and description  
The dataset is supplied as a vector dataset consisting of a set of 1 km squares covering England.  Each square polygon is assigned to one of the 4 landscape masks (where applicable), with a '1' in the relevant landscape type for each square denoting presence.  The calcareous mask also differentiates between different types of limestone and coastal types. 
The column headings in the dataset are as follows:
Column Name	Type	Description	
DOMGEOL	Number	Relates to calcareous mask	
		2 = Oolitic limestone	
		7 = Chalk	
		8 = Massive limestone
0 = Other (where Calc = 1)	
COAST	Number	1 = coastal mask	
CALC	Number	1 = calcareous mask	
LOHEATH	Number	1 = lowland heath mask	
UPHEATH	Number	1 = upland mask	
STRATA	Text	Relates to coastal mask
H = hard coast
S = Soft coast
E = Estuarine	
