# Supplementary material for: Land cover and vegetation data from an ecological survey of "key habitat" landscapes in England, 1992–1993
Source: Copernicus journal article supplement (doi:10.5194/essd-10-899-2018), 2018-05-18
Supplement: Supplementary file 2 [file essd-10-899-2018-supplement.zip › Key_Habitats_Supporting_Document.rtf]

Ecological survey of 'Key Habitats' in England, 1992-93
Dataset Documentation
Dataset Name:	Habitat and vegetation data from an ecological survey of terrestrial key habitats in England, 1992-1993	
Dataset Background & Description:	Since 1978, a series of national surveys (Countryside Surveys) have been carried out by the Institute of Terrestrial Ecology/Centre for Ecology and Hydrology to gather data on the natural environment.  The sampling framework for these surveys is not optimised to yield data on rarer or more specialised habitats.  This Key Habitat survey was commissioned in the early 1990s to carry out additional survey work into habitats which were perceived to be under threat or which represented areas of concern to the Department for the Environment.  The habitats were:  Lowland heath, Chalk and limestone (calcareous) grasslands, Coasts, Uplands.   For reporting purposes, the survey was supplemented by additional data, particularly for river valleys and waterside landscapes (lowlands), from Countryside Survey 1990.	
Geographic Coverage:	England 	
Time Period:	1992-93	
Data Categories:	Vegetation Data:	Vascular plants. Bryophytes. Lichens.	
	Boundary data:	Boundary descriptions at  grid points across each 1km survey square	
	Habitat Data:	Land cover data at grid points across each 1km survey square	
Survey Design & Methods:	Stratified sampling across entire area.  Bunce & Shaw's 1973 standardized survey methods with modifications – refer to field handbooks. 	
Related Datasets:	 Countryside Survey http://www.countrysidesurvey.org.uk/	
Key documents & publications:	·	Barr, C.J. (1993) Changes in Key Habitat: Surveys of Chalk & Limestone Grassland, Coastal, and Upland Landscapes, Field Handbook. Draft 3. Grange-over-Sands, NERC/Institute of Terrestrial Ecology. 
·	Barr, C.J. (1992) Changes in Key Habitat: A Survey of Lowland Heath, Field Survey Handbook. ITE Merlewood. 
·	Barr, C.J. (1997) Current Status and Prospects for Key Habitats in England, Part 6 Summary Report. Institute of Terrestrial Ecology, University of Sheffield - Unit of Comparative Plant Ecology, Environmental Resource Management Ltd, Department of the Environment, Transport and the Regions.
·	Bunce R.G.H & Shaw M.W. (1973). A Standardized Procedure for Ecological Survey. Journal of Environmental Management,  Vol. 1, 239-258.	
Originator Details:	Survey & Project Management: Barr C.J., Bunce, R.G.H., Cummins, R.P., Hallam, C.J. Hornung, M.:  Institute of Terrestrial Ecology, Merlewood, Grange over Sands, Cumbria.
Data management: Wood, C.M.: Centre for Ecology & Hydrology, Lancaster.	
Field surveyors:	H. Adams, T. Barden, E. Biron, R. Cummins, J. Davis, J. Day, D. De La Pole, C. Hallam, M. Harrison, R. Hewison, J. Hobbs, C. Kanefsky, G. Levine, M. Marler, D. McCutcheon, L. McDonnell, M. Ness, K. Pollock, S. Walters, M. Webb
	
Quality control: 	All data were collected by trained surveyors. Collected data have been checked and verified as far as possible.	
Geographical Coverage 
Key Habitat Survey of England 1992-93 - Habitat Data & Boundary Data


At each point on a regular grid (16 or 25 depending on landscape/habitat type), within 1 km survey squares, codes describing land cover and the nearest boundary were recorded.  Refer to field handbooks for more detail (Barr, 1992;Barr, 1993).


Land Cover Data
Land Cover at each grid point was described using Countryside Survey 1990 Codes.  A list of these codes can be found in Appendix II.  The codes reflected the “mappable unit” in which the point fell.  The minimum mappable unit was 400m2.  Each mappable unit was determined by the constancy of the codes which described it.  If one characteristic (e.g. cover of a dominant plant species) was sufficiently different from an adjacent area to be given a different code then a new mappable unit was recognised.

Boundary data
The nearest vertical boundary to each grid point (within 100m) was described using Countryside Survey 1990 Codes. A list of these codes can be found in Appendix III.  The point on the boundary which was nearest to the grid point was recorded as part of a length which can be coded constantly as part of a single unit of not less than 20m (the minimum mappable length).  If the nearest point on the boundary was part of a longer length, then the coding reflected the variability of the longer length.  Vertical boundaries included: hedgerows, walls, fences, earth/stone banks acting as field boundaries; any combination of these.  
Key Habitat Survey of England 1992-93 - Vegetation Data
Detailed plant species information was collected from a series of plots (as outlined in table 1).  In this survey, 4 types of plot were used:
a)	Main (X) plots: these were either 4m2 or 200m2 (nested), depending on the landscape type (see table 1) and were located at five of the grid points within the square (200m2) or all grid points (4m2).
b)	Targeted (Y) plots: these are 4m2 and 5 were placed in semi-natural vegetation types/ habitats that had not been covered by the main plots.
c)	Stream side (S) and waterside (W) plots: these are 10 x 1m plots and up to 5 were placed immediately adjacent to watercourse where present, in Upland Landscapes only.
d)	 Roadside (R) and Verge (V) plots: these are 10x1m plots and up to 5 were placed immediately adjacent to roads where present in Limestone and Chalk (calcareous) landscapes only.

Table 1: Summary of Survey Sites (refer to field handbooks)
Habitat	No. of 1km squares	Map  Grid	X Plots (200m2)	X plots (2x2m)	Y Plots (2x2m)	SW plots (10x1m)	RV plots
(10x1m)	Year surveyed	
Calcareous	43	16 points, A-P	-	5 plots  recorded at AJGDP
	5 at locations selected by surveyor	-	5 plots adjacent to roadsides.	1993	
Coastal	49	25 points, A-Y	5 plots recorded at points ALITW
	-	5 at locations selected by surveyor	-	-	1993	
Lowland Heath	89	25 points, A-Y	-	25 plots, on grid.	-	-	-	1992	
Upland Heath	32	16 points, A-P	5 plots recorded at AJGDP
	-	5 at locations selected by surveyor	5 plots adjacent to watercourses	-	1993	
Total	213	-	240	675	620	150	201	-	


Table 2: Summary of Vegetation Plots
Habitat	No. of 1km squares	X Plots (200m2)	X plots (4m2)	Y Plots (2x2m)	SW plots (10x1m)	RV plots
(10x1m)	
Calcareous	43	-	122	215	-	81(R)
120(V)	
Coastal	49	92	-	245	-	-	
Lowland Heath	89	-	553	-	-	-	
Upland Heath	32	148	-	160	60 (S)
90 (W)	-	
Total	213	240	675	620	150	201	
Note: 35 squares have no plot data, mostly in the lowland heath habitat (not recorded due to being located in arable or intensively improved grassland)
Key Habitat Survey of England 1992-93 - Datasets
List of tables
Table Name	Description	
Key_Habitat_Survey_Squares.csv	List of set of 1km squares surveyed, for each habitat type	
Key_Habitat_Plot_Headers.csv	Vegetation plot header information and location 	
Key_Habitat_Plot_Species.csv	List of plant species recorded within each vegetation plot	
Key_Habitat_LC_Features.csv	Land cover data mapped at each grid point within squares	
Key_Habitat_LC_Species.csv	Species details pertaining to land cover features in Key_Habitat_LC_Features table	
Key_Habitat_BD_Features.csv	Boundary data mapped at each grid point within squares	
Key_Habitat_BD_Species.csv	Species details pertaining to boundary features in Key_Habitat_BD_Features table	


Table Relationships  


Table Descriptions
Key_Habitat_Survey_Squares.csv
Information from front cover of Field Assessment Booklet regarding 1km survey square.  Site code, county in which located, end of survey date, habitat type. 
Column name	Description	Type	
SERIES_NUM	Survey square number	Text	
COUNTY	County square located in	Text	
END_DATE	Date survey square finished	Date	
HAB_TYPE	Key Habitat (landscape) type	Text	

Key_Habitat_Plot_Headers.csv
Vegetation plot header information and location (where known).
Column name	Description	Type	
HAB_TYPE	Key Habitat (landscape) type	Text	
SERIES_NUM	Survey square number	Text	
REP_ID	Code of plot	Text	
QUAD_TYPE	Type of plot: Y (targeted), X (main plot), R (roadside),V (verge), S (stream),W (waterside)  (see handbook)	Text	
REP_CODE	Number of plot if X, Y, R or V plot types (rather than alphabetic grid codes)	Text	
PLOT_SIZE	Size of plot: Y= 2x2m, X= 200m2 (14.1x14.1m) or 2x2m, R=10x1m S=10x1m  (see handbook)	Text	
USE1	Land Use code 1 (from plot sheet)	Numeric	
USE1_DESC	Land Use code 1 description	Text	
USE2	Land Use code 2 (from plot sheet)	Numeric	
USE2_DESC	Land Use code 2 description	Text	
USE3	Land Use code 3 (from plot sheet)	Numeric	
USE3_DESC	Land Use code 3 description	Text	
PHYS	Physiology code (from plot sheet)	Numeric	
PHYS_DESC	Physiology description	Text	
SLOPE	Slope description. (from plot sheet)
Flat (no slope discernable), Slight (<5o by eye), Moderate (6-15o), Steep (>15)	Text	
ASPECT	Aspect in degrees from north. None if flat (from plot sheet)	Numeric	
SHADE	Shade description (from plot sheet).  Full/open/partial/none	Text	
GRAZING	Grazing description (from plot sheet)	Text	
SUBSTRATE	Substrate description (from plot sheet)	Text	
SOIL_DEPTH	Soil depth (from plot sheet)	Text	
DESCRIPTION1	Site description 1 – notes (from plot sheet)	Text	
DESCRIPTION2	Site description 2 – notes (from plot map sheet)	Text	

Key_Habitats_Plot_Species.csv
List of plant species and covers recorded within each vegetation plot. Note: Bare ground and total bryophytes not entered in R/V or S/W plots.
Column name	Description	Type	
SERIES_NUM	Survey square number	Text	
REP_ID	Plot code description, sometimes the same as Gridcode in squares where plots were done on the 16/25 point grid	Text	
SPNO	Species code number	Numeric	
BRC_NUMBER	Biological record centre species code	Text	
BRC_NAMES	Biological record centre species name (following New flora of the British Isles, Stace, C., Cambridge University Press, 2010)	Text	
COMMON_NAME	Common name of species where available	Text	
PRES	Quadrat nest number in which species first appears (see handbook). If relevant COVER or COVER2 is 0 and PRES >=1, then species is present at <5% cover. For Total Bryophytes and Lichens, 0 = whole quadrat.	Numeric	
COVER	Cover % for inner quadrat 4m2 where plots are 200m2, otherwise whole plot for un-nested plots	Numeric	
COVER2	Cover % for entire plot 200m2  where plots are 200m2, otherwise N/A.  	Numeric	
HAB_TYPE	Key Habitat (landscape) type	Text	

Key_Habitat_LC_Features.csv
Land cover data mapped at each grid point within survey squares.
Column Name	Description	Type	
HAB_TYPE	Key Habitat (landscape) type	Text	
SERIES_NUM	Survey square number	Text	
GRIDCODE	Location of plot on square grid 	Text	
SP_LINK	Additional link to Key_Habitat_LC_Species.csv table		
HABT	Habitat type code	Numeric	
HABT_DESC	Habitat type description	Text	
LUSE	Land Use Code (see appendix V)	Text	
USE	Use code	Numeric	
USE_DESC	Use description	Text	
NO_HORSES	Number of horses	Numeric	
CANOPY	Canopy code	Numeric	
CANOPY_DESC	Canopy description	Text	
DESC	Description code	Numeric	
DESC_DESC	Description of description code	Text	
FOF	Forestry feature type code	Numeric	
FOF_DESC	Forestry feature description	Text	
FORBS	Forbs cover code	Numeric	
FORBS_DESC	Forbs cover description	Text	
HEATHER	Heather type code	Numeric	
HEATHER_DESC	Heather type description	Text	
OTHER	Additional  other code	Numeric	
OTHER_DESC	Additional other description	Text	
PEAT	Peat code	Numeric	
PEAT_DESC	Peat cover description	Text	
OTHER_USE	Additional use code	Numeric	
OTHER_USE_DESC	Additional use description	Text	
WEEDPROP	Proportion of weeds code	Numeric	
WEEDPROP_DES	Proportion of weeds code	Text	

Key_Habitat_LC_Species.csv	
Species details pertaining to land cover features in Key_Habitat_LC_Features table
Column Name	Description	Type	
SERIES_NUM	Survey square number	Text	
GRIDCODE	Location of plot on square grid	Text	
SPECIES	Species code 	Numeric	
SP_LINK	Additional link to Key_Habitat_LC_Features.csv table	Numeric	
SPECIES_DESC	Description of species	Text	
AGE	Age code	Numeric	
AGE_DESC	Description of age of species 	Text	
COVER	Percentage cover code of species	Numeric	
COVER_DESC	Description of Percentage cover of species. Note: sometimes this refers to the cover of the overall feature - these should be cover codes (COVER) 651-655 but occasionally these have been used for species and there is some confusion.	Text	
MGT	Management code 	Numeric	
MGT_DESC	Description of management	Text	
HEIGHT	Height of species 	Numeric	
HEIGHT_DESC	Description of height	Text	

Key_Habitat_BD_Features 
Boundary data mapped at each boundary nearest to grid points within survey squares.
Column Name	Description	Type	
SERIES_NUM	Survey square number	Text	
GRIDCODE	Location of plot on square grid	Text	
SP_LINK	Additional link to Key_Habitat_BD_Species.csv table	Numeric	
HABT	Habitat/feature code	Numeric	
HABT_DESC	Habitat/feature description	Text	
LUSE	Land Use code (see appendix V)	Text	
BRACKEN	Bracken code	Numeric	
BRACKEN_DESC	Bracken description	Text	
BRACKEN_HT_CODE	Bracken height code	Numeric	
BRACKEN_HT	Bracken height description	Text	
GAPS	Gaps code	Numeric	
GAPS_DESC	Gaps description	Text	
MGT	Management code	Numeric	
MGT_DESC	Management description	Text	
STOCK	Stock proof code	Numeric	
STOCK_DESC	Stock proof description	Text	
USE	Use code	Numeric	
USE_DESC	Use description	Text	
DESC1	Description 1 code	Numeric	
DESC1_DESC	Description 1 description	Text	
DESC2	Description 2 code	Numeric	
DESC2_DESC	Description 1 description	Text	
DESC3	Description 3 code	Numeric	
DESC3_DESC	Description 3 description	Text	
OTHER	Other information	Numeric	
OTHER_DESC	Other information description	Text	
CANOPY	Canopy code	Numeric	
CANOPY_DESC	Canopy description	Text	
HEIGHT	Feature height code	Numeric	
HEIGHT_DESC	Feature height description	Text	
HAB_TYPE	Key Habitat type	Text	

Key_Habitat_BD_Species	
Species details pertaining to land cover features in Key_Habitat_BD_Features table
Column Name	Description	Type	
SERIES_NUM	Survey square number	Text	
GRIDCODE	Location of plot on square grid	Text	
SP_LINK	Link to Key_Habitat_BD_Features.csv table		
SPECIES	Species code 	Long integer	
SPECIES_DESC	Species description	Text	
AGE	Age code (of trees)	Long Integer	
AGE_DESC		Age description (of trees)	Text	
PROPORTION	Proportion of cover of species code	Long Integer	
PROP_DESC	Proportion of cover of species description	Text	


Appendix 1 - List of Square codes and habitats/landscape types

Habitat	Square code	Habitat	Square code	Habitat	Square code	Habitat	Square code	Habitat	Square code	
Calcareous	AD1	Lowland Heath	A1	Lowland Heath	D7	Upland Heath	MD1	Coastal	ED10	
Calcareous	AD10	Lowland Heath	A10	Lowland Heath	D8	Upland Heath	MD10	Coastal	ED2	
Calcareous	AD101	Lowland Heath	A11	Lowland Heath	E1	Upland Heath	MD2	Coastal	ED3	
Calcareous	AD11	Lowland Heath	A12	Lowland Heath	E10	Upland Heath	MD3	Coastal	ED5	
Calcareous	AD13	Lowland Heath	A2	Lowland Heath	E11	Upland Heath	MD4	Coastal	ED6	
Calcareous	AD2	Lowland Heath	A3	Lowland Heath	E12	Upland Heath	MD5	Coastal	ED7	
Calcareous	AD4	Lowland Heath	A4	Lowland Heath	E2	Upland Heath	MD7	Coastal	ED8	
Calcareous	AD5	Lowland Heath	A5	Lowland Heath	E3	Upland Heath	MD8	Coastal	ED9	
Calcareous	AD6	Lowland Heath	A6	Lowland Heath	E4	Upland Heath	MD9	Coastal	EN10	
Calcareous	AD7	Lowland Heath	A7	Lowland Heath	E5	Upland Heath	MN1	Coastal	EN2	
Calcareous	AD8	Lowland Heath	A8	Lowland Heath	E6	Upland Heath	MN2	Coastal	EN201	
Calcareous	AN1	Lowland Heath	A9	Lowland Heath	E7	Upland Heath	MN3	Coastal	EN3	
Calcareous	AN10	Lowland Heath	B1	Lowland Heath	E8	Upland Heath	MN4	Coastal	EN4	
Calcareous	AN2	Lowland Heath	B2	Lowland Heath	E9	Upland Heath	MN5	Coastal	EN6	
Calcareous	AN4	Lowland Heath	B3	Lowland Heath	F1	Upland Heath	MN6	Coastal	EN7	
Calcareous	AN5	Lowland Heath	B4	Lowland Heath	F2	Upland Heath	MN9	Coastal	EN9	
Calcareous	AN6	Lowland Heath	B5	Lowland Heath	F3	Upland Heath	TD10	Coastal	HD1	
Calcareous	AN7	Lowland Heath	B6	Lowland Heath	F4	Upland Heath	TD101	Coastal	HD10	
Calcareous	AN8	Lowland Heath	B7	Lowland Heath	F5	Upland Heath	TD11	Coastal	HD101	
Calcareous	AN9	Lowland Heath	B8	Lowland Heath	F6	Upland Heath	TD12	Coastal	HD3	
Calcareous	BD1	Lowland Heath	C1	Lowland Heath	F7	Upland Heath	TD13	Coastal	HD4	
Calcareous	BD11	Lowland Heath	C10	Lowland Heath	F8	Upland Heath	TD14	Coastal	HD5	
Calcareous	BD13	Lowland Heath	C11	Lowland Heath	G1	Upland Heath	TD15	Coastal	HD6	
Calcareous	BD14	Lowland Heath	C12	Lowland Heath	G10	Upland Heath	TD2	Coastal	HD7	
Calcareous	BD15	Lowland Heath	(L)C13	Lowland Heath	G11	Upland Heath	TD4	Coastal	HD9	
Calcareous	BD16	Lowland Heath	(L)C14	Lowland Heath	G12	Upland Heath	TD6	Coastal	HN1	
Calcareous	BD17	Lowland Heath	(L)C15	Lowland Heath	(L)G13	Upland Heath	TD7	Coastal	HN10	
Calcareous	BD18	Lowland Heath	(L)C16	Lowland Heath	(L)G14	Upland Heath	TD8	Coastal	HN2	
Calcareous	BD19	Lowland Heath	(L)C17	Lowland Heath	(L)G15	Upland Heath	TD9	Coastal	HN3	
Calcareous	BD21	Lowland Heath	C2	Lowland Heath	(L)G16	Upland Heath	TN2	Coastal	HN4	
Calcareous	BD22	Lowland Heath	C3	Lowland Heath	G2	Upland Heath	TN3	Coastal	HN5	
Calcareous	BD4	Lowland Heath	C4	Lowland Heath	G3	Upland Heath	TN4	Coastal	HN6	
Calcareous	BD7	Lowland Heath	C5	Lowland Heath	G4	 		Coastal	HN9	
Calcareous	BD8	Lowland Heath	C6	Lowland Heath	G5	Lowland Heath	H6	Coastal	SD1	
Calcareous	BD9	Lowland Heath	C7	Lowland Heath	G6	Lowland Heath	H7	Coastal	SD10	
Calcareous	BN10	Lowland Heath	C8	Lowland Heath	G7	Lowland Heath	H8	Coastal	SD2	
Calcareous	BN101	Lowland Heath	C9	Lowland Heath	G8	 		Coastal	SD4	
Calcareous	BN2	Lowland Heath	D1	Lowland Heath	G9	Coastal	SN2	Coastal	SD5	
Calcareous	BN5	Lowland Heath	D2	Lowland Heath	H1	Coastal	SN3	Coastal	SD7	
Calcareous	BN6	Lowland Heath	D3	Lowland Heath	H2	Coastal	SN5	Coastal	SD8	
Calcareous	BN7	Lowland Heath	D4	Lowland Heath	H3	Coastal	SN6	Coastal	SD9	
Calcareous	BN8	Lowland Heath	D5	Lowland Heath	H4	Coastal	SN7	Coastal	SN1	
Calcareous	BN9	Lowland Heath	D6	Lowland Heath	H5	Coastal	SN8	Coastal	SN10	

Appendix II - Land Cover Codes
CODE	DESCRIPTION		CODE	DESCRIPTION		CODE	DESCRIPTION		
1	Cliff > 30m high	P	113	Fen	P	163	Molinia caerulea		
2	Cliff 5-30m high	P	114	Marsh	P	164	Eriophorum angustifolium		
3	Rock outcrop & cliff < 5m	P	115	Flush	P	165	Eriophorum vaginatum		
4	Scree	P	116	Saltmarsh	P	166	Trichorophorum caespitosum		
5	Surface boulders	P	117	Wheat	P	167	Sphagnum spp.		
6	Limestone pavement	P	118	Barley	P	168	Juncus squarrosus		
7	Peat hags	P	119	Oats	P	169	Juncus squarrosus		
10	Soil erosion	P	120	Sugar beat	P	170	Erica cinerea		
17	10-50% peat		121	Turnips/swedes/roots	P	175	25-50%		
31	Cliff > 30m high	P	122	Kale	P	176	50-75%		
32	Cliff 5-30m high	P	123	Potatoes	P	177	75-95%		
34	Rocky/boulder shore	P	124	Field beans	P	178	95-100%		
35	Pebble/gravel shore	P	125	Peas	P	179	< 10cm		
36	Sandy shore (or dune)	P	126	Maize	P	180	10-30cm		
37	Bare mud	P	127	Rye	P	181	30-50cm		
38	Sea	P	128	Oilseed rape	P	182	0.5-1m		
51	Lake - natural	P	129	Other crop	P	183	1-1.5m		
52	Lake - artificial	P	130	Flowers	P	184	> 1.5m		
53	River	P	131	Commercial horticulture	P	185	Beef		
54	Canalised river	P	132	Orchard	P	186	Dairy		
55	Canal	P	133	Unmanaged grass	P	187	Breeders		
56	Stream	P	134	Tall herb vegetation	P	188	Dual purpose		
58	Other ditch	P	136	Ley		189	Sheep		
61	Signs of drainage	P	137	Unimproved grass		190	Goats		
64	Levee	P	138	Forbs 10-25% (grass)		191	Horses		
65	Bank < 1m		139	Forbs 25-50% (grass)		192	Pigs		
66	Bank 1-5m		140	Forbs > 50% (grass)		193	Silage		
67	Bank > 5m		141	Neglected		194	Hay		
90	Burnt heather		142	Abandoned		195	Deer		
91	Regenerating heather		143	Ploughed	P	196	Grouse		
92	Vigorous heather		144	Burnt		197	No apparent use		
93	Heather mosaic		145	Mown		201	Individual trees	P	
94	Heather dominant		146	Lolium multiflorum		202	Scattered trees	P	
95	Collapsing heather		147	Lolium perenne		203	Line of trees	P	
96	Mat heather		148	Trifolium repens		204	Belt of trees	P	
97	Bushy heather		149	Dactylis glomerata		205	Clump of trees	P	
98	Mop heather		150	Anthoxanthum odoratum		206	Woodland/forest	P	
99	Dead heather		151	Phleum pratense		207	Individual scrub species	P	
101	Lowland agricultural grass	P	152	Cynosurus cristatus		208	Scattered scrub	P	
102	Upland grass	P	153	Holcus lanatus		209	Line of scrub	P	
103	Moorland - grass	P	154	Agrostis tenuis		210	Patch of scrub	P	
104	Moorland - shrub heath	P	155	Festuca ovina		215	Closed canopy		
105	Calcareous grassland	P	156	Pteridium aquilinum - dense	P	216	Canopies not touching		
106	Maritime vegetation	P	157	Pteridium aquilinum -scattered		218	Parkland		
107	Lowland heath	P	158	Juncus effusus		221	Fir - Douglas		
108	Aquatic macrophytes	P	159	Deschampsiaflexuosa		222	Larch		
110	Raised bog	P	160	Nardus stricta		223	Pine - Corsican		
111	Blanket bog	P	161	Calluna vulgaris		224	Pine - Lodgepole		
112	Valley bog	P	162	Vaccinium myrtilus		225	Pine – Scots		


	
								
CODE	DESCRIPTION		CODE	DESCRIPTION		CODE	DESCRIPTION		
226	Spruce - Norway		291	Regrowth - cut stump		508	Touring caravan park	P	
227	Spruce - Sitka		292	Grazing (stock)		511	Other designated area	P	
228	Unspecified conifer		293	Ride/firebreak	P	521	Horsiculture	P	
231	Alder		294	Bracken - dense		522	Angling	P	
232	Ash		295	Bracken - scattered		524	Other recreation	P	
233	Beech		322	Hedge > 50% other species	P	601	Dry heath	P	
234	Birch		331	Stone bank	P	602	Wet heath	P	
235	Bramble		341	> 2m high		605	Rock crevice veg (maritime)		
236	Elder		358	Uncut		608	Maritime grassland		
237	Elm		364	Bracken present		609	Maritime heath		
239	Gorse		401	Building	P	610	Strandline vegetation		
240	Hawthorn		402	Garden/grounds with trees	P	613	Stable yellow dune		
241	Hornbeam		403	Garden/grounds without trees	P	615	Dune slacks		
242	Lime		404	Public open space	P	616	Inundation grassland (maritime)		
243	Oak		405	Amenity grass > 1ha	P	621	Pioneer saltmarsh		
244	Poplar		406	Allotments	P	622	Low marsh		
245	Rowan		407	Car park	P	623	Middle/upper marsh		
246	Sweet chestnut		409	Graden centre/nursery	P	625	Weeds>10%		
247	Sycamore		410	Embankment	P	626	Weeds>25%		
248	Willow		411	Other land	P	627	Weeds>50%		
250	Mixed broadleaf		421	Residential		628	Festuca rubra		
251	Mixed conifer		422	Commercial		630	Cattle		
252	Unspecified broadleaf		423	Industrial		631	Setaside		
256	25-50%		424	Public service & facilities		640	Blackthorn		
257	50-75%		425	Institutional		641	Hazel		
258	75-95%		426	Educational/cultural		645	Glade	P	
259	95-100%		427	Religious		651	10-25% (1ry codes only)		
261	1-4 years		428	Agricultural		652	26-50%		
262	5-20 years		429	Sporting/recreational		653	51-75%		
263	20-100 years		430	Waste - domestic	P	654	76-95%		
264	> 100 years		431	Waste - industrial	P	655	96-100%		
266	Timber production		432	Quarry/mine		678	Calcareous		
267	Landscape		433	Gravel pit		777	Unknown	P	
268	Sporting/game		441	New		888	New to map	P	
269	Public recreation		442	Vacant					
270	Nature conservation		443	Derelict					
271	Shelter		451	Railway track/land	P				
275	Well managed		452	Road (tarmac)	P				
276	Unmanaged - thriving		453	Verge < 1m					
277	Unmanaged - improvable		454	Verge 1-5m			* P = Primary Code 

		
278	Declining		455	Verge > 5m			Note: Surveyors were allowed		
281	Felling/stumps		456	Constructed track	P		to add unique codes in each		
282	Natural regeneration		457	Unconstructed track	P		Square, therefore certain 		
283	Underplanting		458	Footpath (exclusive)	P		codes will not be listed here		
284	Planted		459	Footpath (other)	P				
286	Staked trees		460	Satisfactory throughout					
287	Tree protectors		501	School playing fields	P				
288	Fenced (single trees)		502	Other playing fields	P				
289	Windblow		503	Golf course	P				
290	Dead standing trees	P	507	Static caravan(s)	P				
Appendix III -  Boundary Codes
CODE	DESCRIPTION		CODE	DESCRIPTION		CODE	DESCRIPTION		
34	Rocky/boulder shore	P	237	Elm		352	Not stockproof		
38	Sea	P	238	Field maple		353	Filled gaps < 10%		
52	Lake - artificial	P	239	Gorse		354	Filled gaps > 10%		
53	River	P	240	Hawthorn		355	Signs of replacement		
55	Canal	P	241	Hornbeam		356	Signs of removal		
56	Stream	P	242	Lime		357	Trimmed		
57	Roadside ditch	P	243	Oak		358	Uncut		
58	Other ditch	P	244	Poplar		359	Derelict		
62	Waterfall	P	245	Rowan		360	Line of relict hedge		
63	Gorge	P	246	Sweet chestnut		361	Laying		
65	Bank < 1m		247	Sycamore		362	Flailing		
66	Bank 1-5m		248	Willow		363	Regrowth from stumps		
67	Bank > 5m		250	Mixed broadleaf		364	Bracken present	P	
94	Heather dominant		251	Mixed conifer		410	Embankment		
112	Valley bog	P	252	Unspecified broadleaf		421	Residential		
113	Fen	P	256	25-50%		443	Derelict	P	
134	Tall herb vegetation	P	257	50-75%		457	Unconstructed track		
149	Dactylis glomerata		258	75-95%		640	Blackthorn		
151	Phleum pratense		259	95-100%		641	Hazel		
162	Vaccinium myrtilus		261	1-4 years		651	10-25% (1ry codes only)		
175	25-50%		262	5-20 years		652	26-50%		
176	50-75%		263	20-100 years		653	51-75%		
178	95-100%		264	> 100 years		654	76-95%		
180	10-30cm		267	Landscape		655	96-100%		
181	30-50cm		271	Shelter		888	New to map	P	
182	0.5-1m		282	Natural regeneration		999	No longer on map		
183	1-1.5m		284	Planted					
184	> 1.5m		286	Staked trees					
189	Sheep		287	Tree protectors					
201	Individual trees	P	290	Dead standing trees	P				
203	Line of trees	P	291	Regrowth - cut stump					
204	Belt of trees	P	295	Bracken - scattered					
205	Clump of trees	P	301	Dry-stone wall	P				
207	Individual scrub species	P	302	Mortared wall	P				
208	Scattered scrub	P	303	Other wall	P				
209	Line of scrub	P	311	Fence - wood only	P				
210	Patch of scrub	P	312	Fence - iron only	P		* P = Primary Code		
215	Closed canopy		313	Fence - wire on posts	P		Note: Surveyors were allowed		
216	Canopies not touching		314	Other fence	P		to add unique codes in each		
217	Hedgerow		321	Hedge > 50% hawthorn	P		Square, therefore certain 		
222	Larch		322	Hedge > 50% other species	P		codes will not be listed here		
225	Pine - Scots		323	Mixed hedge	P				
228	Unspecified conifer		331	Stone bank	P				
231	Alder		332	Earth bank	P				
232	Ash		333	Grass strip only	P				
233	Beech		341	> 2m high					
234	Birch		342	1-2m high					
235	Bramble		343	< 1m high					
236	Elder		351	Stockproof					
Appendix IV: LUSE Codes
WLF	Woody linear feature (hedge)	
AN	Agriculture/Natural Vegetation	
CF	Coastal Feature	
FO	Forestry	
FOU	Forestry Use	
IL	Inland Physiography	
IW	Inland Water	
RE	Recreation	
ST	Structures	
TR	Transport	
AC	Agricultural Crops	
FOF	Forestry Feature	
GS	Grass Strip	
B	Bank	
F	Fence	
W	Wall	
US	Un-surveyed/Missing Data	
AGU	Agriculture/Natural Vegetation Use	
